# Supplementary material
Source: MDPI journal article supplement (https://www.mdpi.com/2071-1050/15/16/12532)
Supplement: s1 [file s1]

# **The sources of polycyclic aromatic hydrocarbons in road dust and their potential hazard**

Nurul Hidayah Hishamuddin<sup>1</sup>, Md Firoz Khan<sup>1,2\*</sup>, Hamidah Suradi<sup>1</sup>, B. M. Zuhair Siraj<sup>2</sup>, Md. Towhidul Islam<sup>2</sup>, Nor Asrina Sairi<sup>1</sup>, Hairul Anuar Tajuddin<sup>1</sup>, Arniza Khairani Mohd Jamil<sup>1</sup>, Md. Jahurul Haque Akanda<sup>3,4</sup>, Sumiani Yusoff<sup>5</sup>

<sup>1</sup>Department of Chemistry, Faculty of Science, 50603 Kuala Lumpur, Malaysia

<sup>2</sup>Department of Environmental Science and Management, North South University, Dhaka 1229, Bangladesh.

<sup>3</sup>Faculty of Food Science and Nutrition, University Malaysia Sabah, 88400, Kota Kinabalu, Sabah, Malaysia

<sup>4</sup>Department of Agriculture, University of Arkansas, 1200 North University Dr., M/S 4913, Pine Bluff, AR 71601; akandam@uapb.edu

<sup>5</sup>Institute of Ocean and Earth Environmental (IOES), University of Malaya, Kuala Lumpur, 50603, Malaysia

\*Corresponding author E-mail: firoz.khan@northsouth.edu; mdfiroz.khan@gmail.com

### **Details of the study areas**

Kuala Lumpur is the capital city of Malaysia, located approximately 40 kilometres from the coast, within the federal state of Selangor. Its area is 243 square kilometres and as much as 1.8 million people live in its centre. The public rail transportation connecting places to places in Kuala Lumpur is aplenty such as Monorail, Light Rail Transit (LRT), Mass Rapid Transit (MRT) and Keretapi Tanah Melayu (KTM) Commuter. These various rail networks are integrated at the KL Sentral station. Each rail station is equipped with RapidKL feeder buses. The RapidKL feeder buses move between stations and the biggest hub is at Pasar Seni, Kuala Lumpur.

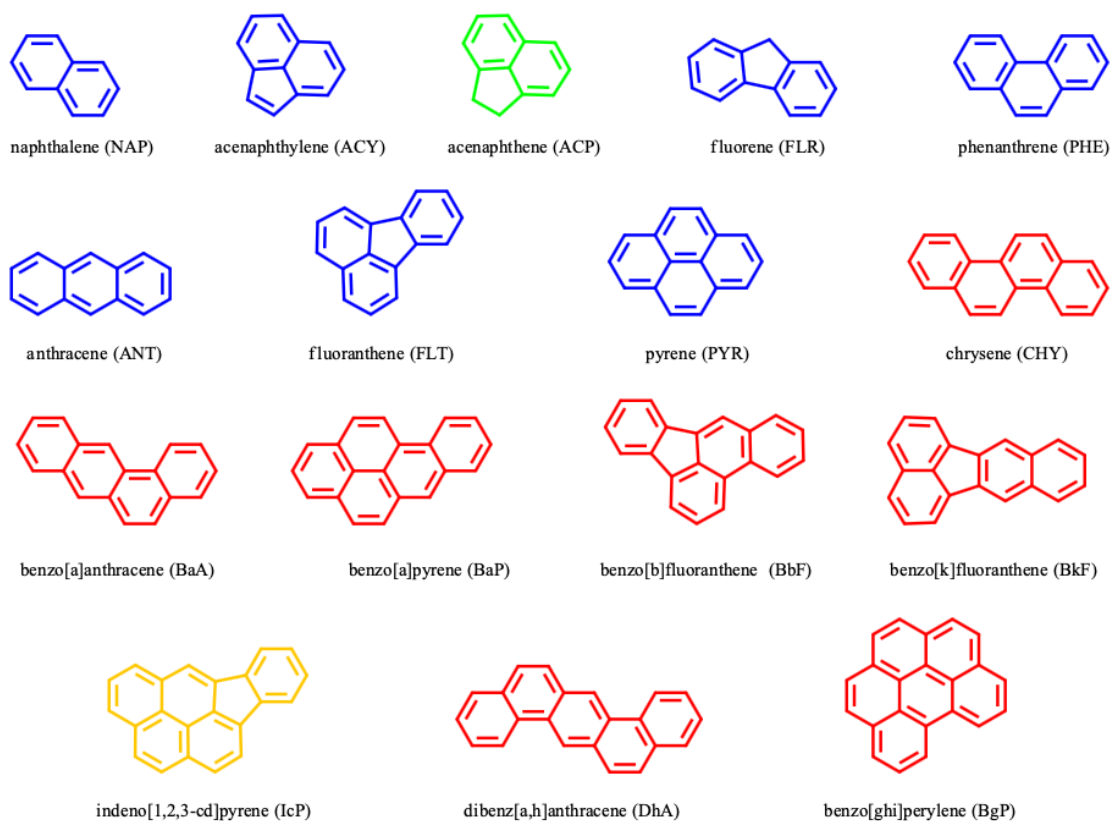

**Figure S1:** Structure of 16 priority PAHs that listed by EPA

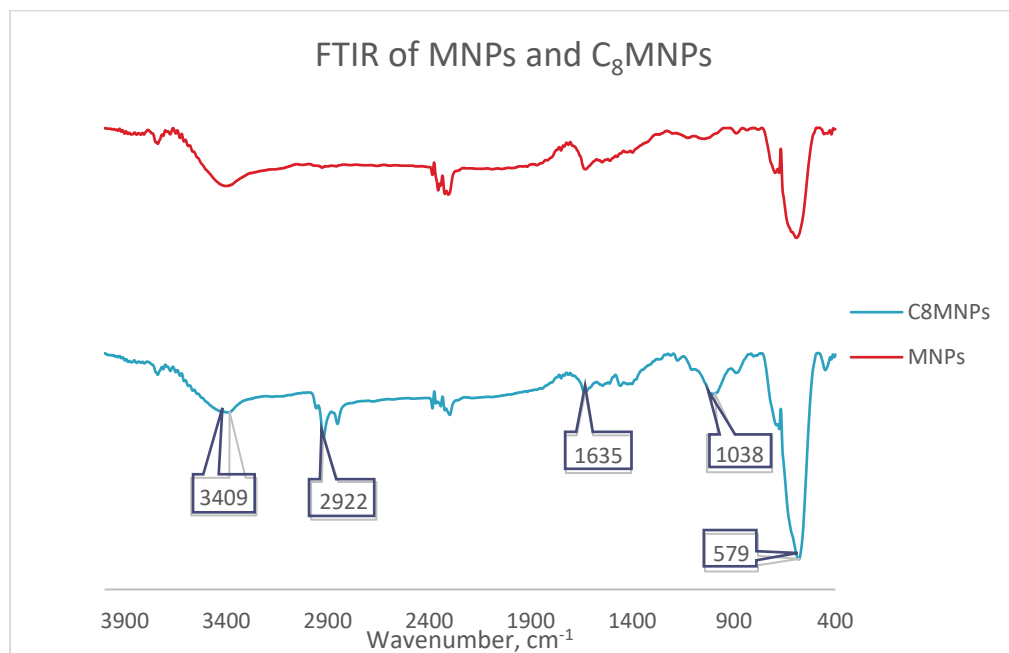

**Figure S2:** FTIR Spectrum of both MNPs and C<sub>8</sub>MNPs

**Table S1:** Sampling point descriptions in Kuala Lumpur, Malaysia.

| Sampling Point | Descriptions               | Latitude (°) | Longitude (°) | Sampling date | Time (hours) |
|----------------|----------------------------|--------------|---------------|---------------|--------------|
| KL 1           | MRT station, bus stop      | 3.135779     | 101.631027    | 24 Sep 2019   | 1018         |
| KL 2           | Mosque, parking lot        | 3.145418     | 101.629281    | 24 Sep 2019   | 1107         |
| KL 3           | MRT station, bus stop      | 3.144172     | 101.663269    | 24 Sep 2019   | 1151         |
| KL 4           | MRT station, bus station   | 3.151795     | 101.665823    | 24 Sep 2019   | 1345         |
| KL 5           | LRT station, bus stop      | 3.220156     | 101.721553    | 25 Sep 2019   | 1034         |
| KL 6           | LRT station, bus stop      | 3.205259     | 101.732330    | 25 Sep 2019   | 1058         |
| KL 7           | LRT station, bus station   | 3.058475     | 101.691762    | 25 Sep 2019   | 1250         |
| KL 8           | LRT station, bus stop      | 3.089640     | 101.712745    | 25 Sep 2019   | 1318         |
| KL 9           | MRT station, bus stop      | 3.142553     | 101.720125    | 25 Sep 2019   | 1740         |
| KL 10          | MRT station, bus stop      | 3.078634     | 101.746442    | 26 Sep 2019   | 1122         |
| KL 11          | MRT station, bus stop      | 3.104636     | 101.732534    | 26 Sep 2019   | 1221         |
| KL 12          | Shopping mall, parking lot | 3.124075     | 101.727573    | 26 Sep 2019   | 1311         |
| KL 13          | MRT station, bus stop      | 3.142273     | 101.701850    | 26 Sep 2019   | 1537         |
| KL 14          | LRT station, bus stop      | 3.061188     | 101.662002    | 26 Sep 2019   | 1714         |
| KL 15          | LRT station, bus stop      | 3.062070     | 101.670175    | 26 Sep 2019   | 1738         |
| KL 16          | LRT station, bus stop      | 3.061116     | 101.686933    | 26 Sep 2019   | 1753         |
| KL 17          | LRT station, bus stop      | 3.063412     | 101.707858    | 26 Sep 2019   | 1809         |
| KL 18          | Shop lot                   | 3.210009     | 101.719522    | 29 Sep 2019   | 1103         |
| KL 19          | KTM station, bus stop      | 3.112235     | 101.673539    | 29 Sep 2019   | 1227         |
| KL 20          | Hospital, traffic light    | 3.113286     | 101.651380    | 26 Sep 2019   | 1553         |

**Table S2:** TOC concentration ( $\text{ng g}^{-1}$ ) of street dust

| Sample ID | Concentrations ( $\text{ng g}^{-1}$ ) | Sample ID | Concentration ( $\text{ng g}^{-1}$ ) |
|-----------|---------------------------------------|-----------|--------------------------------------|
| KL-1      | 2843                                  | KL-11     | 1711                                 |
| KL-2      | 1715                                  | KL-12     | 6321                                 |
| KL-3      | 1146                                  | KL-13     | 2853                                 |
| KL-4      | 1843                                  | KL-14     | 2196                                 |
| KL-5      | 2234                                  | KL-15     | 1386                                 |
| KL-6      | 1384                                  | KL-16     | 6415                                 |
| KL-7      | 2088                                  | KL-17     | 2373                                 |
| KL-8      | 7886                                  | KL-18     | 2034                                 |
| KL-9      | 5687                                  | KL-19     | 831.3                                |
| KL-10     | 5746                                  | KL-20     | 1820                                 |

**Table S3:** Comparison of the PAHs in the street dust from the literatures

| Location               | Number of PAHs | Concentration        | References |
|------------------------|----------------|----------------------|------------|
| Kuala Lumpur, Malaysia | 13             | 2457 (137.8 – 5813)  | This study |
| Jeddah, KSA            | 12             | 14200 (7620 – 30800) | [1]        |
| Hanoi, Vietnam         | 19             | (830 – 5000)         | [2]        |
| Thai Nguyen, Vietnam   | 19             | (490 – 9300)         | [2]        |
| Kumasi, Ghana          | 28             | 2571 (181 – 7770)    | [3]        |
| Xi'an, China           | 16             | 10620 (7259 – 18475) | [4]        |
| Kuala Lumpur, Malaysia | 17             | 224 (2 – 43)         | [(5)]      |

**Table S4:** Diagnostic ratios of PAHs in street dust sample

| Diagnostic Ratio | Location | This Study | Sources               |
|------------------|----------|------------|-----------------------|
| ANT/(ANT + PHE)  | KL-13    | 0.89       | Pyrogenic             |
|                  | KL-14    | 0.87       | Pyrogenic             |
| BaA/(BaA + CHY)  | KL-1     | 0.89       | Biomass burning       |
|                  | KL-2     | 0.79       | Biomass burning       |
|                  | KL-3     | 0.86       | Biomass burning       |
|                  | KL-9     | 0.82       | Biomass burning       |
|                  | KL-13    | 0.86       | Biomass burning       |
|                  | KL-14    | 0.82       | Biomass burning       |
| IcP/(IcP + BgP)  | KL-1     | 0.58       | Diesel                |
|                  | KL-2     | 0.55       | Diesel                |
|                  | KL-3     | 0.57       | Diesel                |
|                  | KL-9     | 0.56       | Diesel                |
|                  | KL-10    | 0.54       | Diesel                |
|                  | KL-13    | 0.58       | Diesel                |
|                  | KL-14    | 0.56       | Diesel                |
| BaP/BgP          | KL-1     | 0.99       | Traffic               |
|                  | KL-2     | 0.64       | Traffic               |
|                  | KL-3     | 0.66       | Traffic               |
|                  | KL-9     | 0.64       | Traffic               |
|                  | KL-10    | 0.77       | Traffic               |
|                  | KL-13    | 0.67       | Traffic               |
|                  | KL-14    | 0.66       | Traffic               |
| BgP/BaP          | KL-1     | 1.01       | Diesel / Car Gasoline |
|                  | KL-2     | 1.56       | Diesel / Car Gasoline |
|                  | KL-3     | 1.51       | Diesel / Car Gasoline |
|                  | KL-9     | 1.55       | Diesel / Car Gasoline |
|                  | KL 10    | 1.30       | Diesel / Car Gasoline |
|                  | KL 13    | 1.48       | Diesel / Car Gasoline |
|                  | KL 14    | 1.52       | Diesel / Car Gasoline |

**Table S5:** Diagnostic Ratios and indicated sources

| Diagnostic Ratio | Value       | Sources                               | a [6]  |
|------------------|-------------|---------------------------------------|--------|
| ANT/(ANT + PHE)  | < 0.1       | Petrogenic <sup>a,b,c</sup>           | b [7]  |
|                  | > 0.1       | Pyrogenic <sup>a,b,c</sup>            | c [8]  |
| FLT/(FLT + PYR)  | < 0.4       | Petrogenic <sup>b,d</sup>             | d [9]  |
|                  | > 0.4       | Pyrogenic <sup>b,d</sup>              | e [10] |
|                  | 0.4         | Gasoline <sup>e,f</sup>               | f [11] |
|                  | 0.4 – 0.5   | Fuel oil <sup>b,d</sup>               | g [12] |
|                  | >0.5        | Grass, wood, coal <sup>b,d</sup>      | h [13] |
|                  | 0.6 – 0.7   | Diesel <sup>e,f</sup>                 | i [12] |
| BaA/(BaA + CHY)  | < 0.2       | Petrogenic <sup>g,b,h</sup>           | j [14] |
|                  | 0.2 – 0.35  | Coal <sup>g,b,h</sup>                 | k [1]  |
|                  | > 0.35      | Pyrogenic <sup>g,b,h</sup>            | l [15] |
|                  | > 0.5       | Wood burning <sup>g,b,h</sup>         |        |
| IcP/(IcP + BgP)  | < 0.2       | Petrogenic <sup>b,c,i,j</sup>         |        |
|                  | > 0.2       | Pyrogenic <sup>b,c,i,j</sup>          |        |
|                  | 0.2 – 0.5   | Petroleum/gasoline <sup>b,c,i,j</sup> |        |
|                  | > 0.5       | Grass, wood, coal <sup>b,c,i,j</sup>  |        |
|                  | 0.82        | Oil combustion <sup>b,c,i,j</sup>     |        |
|                  | 0.35 – 0.70 | Diesel <sup>b,c,i,j</sup>             |        |
| BaP/BgP          | < 0.6       | Non-traffic <sup>b,c</sup>            |        |
|                  | > 0.6       | Traffic <sup>b,c</sup>                |        |
| BgP/BaP          | 0.9 – 3.3   | Diesel/Car gasoline <sup>1</sup>      |        |

**Table S6:** The BaP<sub>eq</sub> concentration (ng g<sup>-1</sup>) of PAHs in street dust sample

| Compound     | TEF   | Mean ± Std. Deviatiaon | Median (Min – Max)    |
|--------------|-------|------------------------|-----------------------|
| ACY          | 0.001 | 0.070 ± 0.021          | 0.078 (0.037 - 0.090) |
| ACP          | 0.001 | 0.025                  | 0.025 (0.025 - 0.025) |
| FLR          | 0.001 | 0.043 ± 0.013          | 0.049 (0.019 - 0.049) |
| PHE          | 0.001 | 0.062 ± 0.003          | 0.062 (0.060 - 0.064) |
| ANT          | 0.01  | 2.659 ± 1.685          | 2.713 (0.734 - 4.832) |
| PYR          | 0.001 | 0.3480 ± 0.292         | 0.314 (0.022 - 0.746) |
| BaA          | 0.1   | 57.85 ± 34.85          | 58.96 (8.471 - 102.3) |
| CHY          | 0.01  | 1.501 ± 0.471          | 1.588 (0.598 - 1.985) |
| BbF          | 0.1   | 49.13 ± 15.96          | 50.83 (20.82 - 67.44) |
| BkF          | 0.1   | 19.12 ± 7.658          | 19.98 (9.378 - 28.05) |
| BaP          | 1     | 429.0 ± 123.9          | 458.0 (191.8 - 539.5) |
| IcP          | 0.1   | 80.55 ± 30.41          | 91.75 (29.04 - 109.4) |
| BgP          | 0.01  | 6.221 ± 2.279          | 7.107 (2.488 - 8.002) |
| Σ Total PAHs | -     | 389.9 ± 362.7          | 382.6 (0.863 - 858.9) |

**Table S7:** Parameters of exposure applied in health risk assessment calculation.

| Parameter              |                                | Unit                              | Children                            | Adult                   |
|------------------------|--------------------------------|-----------------------------------|-------------------------------------|-------------------------|
| CS                     | Chemical Concentration in Soil | mg kg <sup>-1</sup>               | This study                          |                         |
| IR <sub>inh</sub>      | Inhalation Rate                | m <sup>3</sup> day <sup>-1</sup>  | 10 <sup>m,p,q</sup>                 | 20 <sup>m,n,p,r</sup>   |
| IR <sub>ing</sub>      | Ingestion Rate                 | mg day <sup>-1</sup>              | 200 <sup>o</sup>                    | 100 <sup>o</sup>        |
| EF                     | Exposure Frequency             | day year <sup>-1</sup>            | 180 <sup>m,p,q,r</sup>              |                         |
| ED                     | Exposure Duration              | year                              | 6 <sup>n,o</sup>                    | 24 <sup>o</sup>         |
| BW                     | Body Weight                    | kg                                | 15 <sup>n,o</sup>                   | 61.5 <sup>m,p,q,r</sup> |
| AT <sub>non-carc</sub> | Averaging Time                 | day                               | 2190                                | 8760                    |
| AT <sub>carc</sub>     | Averaging Time                 | day                               | 25 550 <sup>o</sup>                 |                         |
| PEF                    | Particle Emission Factor       | m <sup>3</sup> kg <sup>-1</sup>   | 1.36 × 10 <sup>9</sup> <sup>n</sup> |                         |
| AF                     | Adherence Factor               | mg cm <sup>-2</sup>               | 0.2 <sup>n</sup>                    | 0.07 <sup>n</sup>       |
| ABS                    | Dermal Absorption Factor       | No unit                           | 0.13 <sup>n</sup>                   |                         |
| SA                     | Skin Surface Area              | cm <sup>2</sup> day <sup>-1</sup> | 2800 <sup>n</sup>                   | 5700 <sup>n</sup>       |

<sup>m</sup> [16]<sup>n</sup> [17]<sup>o</sup> [18]<sup>p</sup> [19]<sup>q</sup> [20]<sup>r</sup> [21]**Table S8:** Incremental Lifetime Cancer Risk (ILCR) for children through inhalation pathway

| Compound   | Valid N | Mean                    | Min                     | Max                     | Median                  | Std dev.                |
|------------|---------|-------------------------|-------------------------|-------------------------|-------------------------|-------------------------|
| ACY        | 6       | 3.33× 10 <sup>-15</sup> | 1.77× 10 <sup>-15</sup> | 4.31× 10 <sup>-15</sup> | 3.70× 10 <sup>-15</sup> | 9.95× 10 <sup>-16</sup> |
| ACP        | 1       | 1.20× 10 <sup>-15</sup> | 1.20× 10 <sup>-15</sup> | 1.20× 10 <sup>-15</sup> | 1.20× 10 <sup>-15</sup> | -                       |
| FLR        | 5       | 2.05× 10 <sup>-15</sup> | 9.23× 10 <sup>-16</sup> | 2.36× 10 <sup>-15</sup> | 2.35× 10 <sup>-15</sup> | 6.30× 10 <sup>-16</sup> |
| PHE        | 2       | 2.96× 10 <sup>-15</sup> | 2.85× 10 <sup>-15</sup> | 3.07× 10 <sup>-15</sup> | 2.96× 10 <sup>-15</sup> | 1.58× 10 <sup>-16</sup> |
| ANT        | 10      | 1.27× 10 <sup>-13</sup> | 3.51× 10 <sup>-14</sup> | 2.31× 10 <sup>-13</sup> | 1.30× 10 <sup>-13</sup> | 8.04× 10 <sup>-14</sup> |
| PYR        | 11      | 1.66× 10 <sup>-14</sup> | 1.06× 10 <sup>-15</sup> | 3.56× 10 <sup>-14</sup> | 1.50× 10 <sup>-14</sup> | 1.40× 10 <sup>-14</sup> |
| BaA        | 9       | 2.76× 10 <sup>-12</sup> | 4.04× 10 <sup>-13</sup> | 4.88× 10 <sup>-12</sup> | 2.81× 10 <sup>-12</sup> | 1.66× 10 <sup>-12</sup> |
| CHY        | 6       | 7.17× 10 <sup>-14</sup> | 2.85× 10 <sup>-14</sup> | 9.48× 10 <sup>-14</sup> | 7.58× 10 <sup>-14</sup> | 2.25× 10 <sup>-14</sup> |
| BbF        | 8       | 2.35× 10 <sup>-12</sup> | 9.94× 10 <sup>-13</sup> | 3.22× 10 <sup>-12</sup> | 2.43× 10 <sup>-12</sup> | 7.62× 10 <sup>-13</sup> |
| BkF        | 6       | 9.13× 10 <sup>-13</sup> | 4.48× 10 <sup>-13</sup> | 1.34× 10 <sup>-12</sup> | 9.54× 10 <sup>-13</sup> | 3.66× 10 <sup>-13</sup> |
| BaP        | 7       | 2.05× 10 <sup>-11</sup> | 9.16× 10 <sup>-12</sup> | 2.58× 10 <sup>-11</sup> | 2.19× 10 <sup>-11</sup> | 5.91× 10 <sup>-12</sup> |
| IcP        | 7       | 3.85× 10 <sup>-12</sup> | 1.39× 10 <sup>-12</sup> | 5.22× 10 <sup>-12</sup> | 4.38× 10 <sup>-12</sup> | 1.45× 10 <sup>-12</sup> |
| BgP        | 7       | 2.97× 10 <sup>-13</sup> | 1.19× 10 <sup>-13</sup> | 3.82× 10 <sup>-13</sup> | 3.39× 10 <sup>-13</sup> | 1.09× 10 <sup>-13</sup> |
| Total PAHs | 12      | 1.86× 10 <sup>-11</sup> | 4.12× 10 <sup>-14</sup> | 4.10× 10 <sup>-11</sup> | 1.83× 10 <sup>-11</sup> | 1.73× 10 <sup>-11</sup> |

**Table S9:** Incremental Lifetime Cancer Risk (ILCR) for adult through inhalation pathway

| Compound | Valid N | Mean                    | Min                     | Max                     | Median                  | Std dev.                |
|----------|---------|-------------------------|-------------------------|-------------------------|-------------------------|-------------------------|
| ACY      | 6       | 1.04× 10 <sup>-14</sup> | 5.53× 10 <sup>-15</sup> | 1.35× 10 <sup>-14</sup> | 1.16× 10 <sup>-14</sup> | 3.11× 10 <sup>-15</sup> |

|            |    |                        |                        |                        |                        |                        |
|------------|----|------------------------|------------------------|------------------------|------------------------|------------------------|
| ACP        | 1  | $3.76 \times 10^{-15}$ | $3.76 \times 10^{-15}$ | $3.76 \times 10^{-15}$ | $3.76 \times 10^{-15}$ | -                      |
| FLR        | 5  | $6.39 \times 10^{-15}$ | $2.88 \times 10^{-15}$ | $7.38 \times 10^{-15}$ | $7.32 \times 10^{-15}$ | $1.97 \times 10^{-15}$ |
| PHE        | 2  | $9.24 \times 10^{-15}$ | $8.89 \times 10^{-15}$ | $9.59 \times 10^{-15}$ | $9.24 \times 10^{-15}$ | $4.94 \times 10^{-16}$ |
| ANT        | 10 | $3.96 \times 10^{-13}$ | $1.09 \times 10^{-13}$ | $7.20 \times 10^{-13}$ | $4.04 \times 10^{-13}$ | $2.51 \times 10^{-13}$ |
| PYR        | 11 | $5.19 \times 10^{-14}$ | $3.30 \times 10^{-15}$ | $1.11 \times 10^{-13}$ | $4.68 \times 10^{-14}$ | $4.36 \times 10^{-14}$ |
| BaA        | 9  | $8.62 \times 10^{-12}$ | $1.26 \times 10^{-12}$ | $1.52 \times 10^{-11}$ | $8.79 \times 10^{-12}$ | $5.20 \times 10^{-12}$ |
| CHY        | 6  | $2.24 \times 10^{-13}$ | $8.91 \times 10^{-14}$ | $2.96 \times 10^{-13}$ | $2.37 \times 10^{-13}$ | $7.03 \times 10^{-14}$ |
| BbF        | 8  | $7.32 \times 10^{-12}$ | $3.10 \times 10^{-12}$ | $1.01 \times 10^{-11}$ | $7.58 \times 10^{-12}$ | $2.38 \times 10^{-12}$ |
| BkF        | 6  | $2.85 \times 10^{-12}$ | $1.40 \times 10^{-12}$ | $4.18 \times 10^{-12}$ | $2.98 \times 10^{-12}$ | $1.14 \times 10^{-12}$ |
| BaP        | 7  | $6.40 \times 10^{-11}$ | $2.86 \times 10^{-11}$ | $8.04 \times 10^{-11}$ | $6.83 \times 10^{-11}$ | $1.85 \times 10^{-11}$ |
| IcP        | 7  | $1.20 \times 10^{-11}$ | $4.33 \times 10^{-12}$ | $1.63 \times 10^{-11}$ | $1.37 \times 10^{-11}$ | $4.53 \times 10^{-12}$ |
| BgP        | 7  | $9.27 \times 10^{-13}$ | $3.71 \times 10^{-13}$ | $1.19 \times 10^{-12}$ | $1.06 \times 10^{-12}$ | $3.40 \times 10^{-13}$ |
| Total PAHs | 12 | $5.81 \times 10^{-11}$ | $1.29 \times 10^{-13}$ | $1.28 \times 10^{-10}$ | $5.70 \times 10^{-11}$ | $5.41 \times 10^{-11}$ |

**Table S10:** Incremental Lifetime Cancer Risk (ILCR) for children through ingestion pathway

| Compound   | Valid N | Mean                   | Min                    | Max                    | Median                 | Std dev.               |
|------------|---------|------------------------|------------------------|------------------------|------------------------|------------------------|
| ACY        | 6       | $1.72 \times 10^{-10}$ | $9.13 \times 10^{-11}$ | $2.22 \times 10^{-10}$ | $1.91 \times 10^{-10}$ | $5.13 \times 10^{-11}$ |
| ACP        | 1       | $6.21 \times 10^{-11}$ | $6.21 \times 10^{-11}$ | $6.21 \times 10^{-11}$ | $6.21 \times 10^{-11}$ | -                      |
| FLR        | 5       | $1.06 \times 10^{-10}$ | $4.76 \times 10^{-11}$ | $1.22 \times 10^{-10}$ | $1.21 \times 10^{-10}$ | $3.25 \times 10^{-11}$ |
| PHE        | 2       | $1.53 \times 10^{-10}$ | $1.47 \times 10^{-10}$ | $1.58 \times 10^{-10}$ | $1.53 \times 10^{-10}$ | $8.15 \times 10^{-12}$ |
| ANT        | 10      | $6.55 \times 10^{-9}$  | $1.81 \times 10^{-9}$  | $1.19 \times 10^{-8}$  | $6.68 \times 10^{-9}$  | $4.15 \times 10^{-9}$  |
| PYR        | 11      | $8.58 \times 10^{-10}$ | $5.45 \times 10^{-11}$ | $1.84 \times 10^{-9}$  | $7.72 \times 10^{-10}$ | $7.20 \times 10^{-10}$ |
| BaA        | 9       | $1.42 \times 10^{-7}$  | $2.09 \times 10^{-8}$  | $2.52 \times 10^{-7}$  | $1.45 \times 10^{-7}$  | $8.58 \times 10^{-8}$  |
| CHY        | 6       | $3.70 \times 10^{-9}$  | $1.47 \times 10^{-9}$  | $4.89 \times 10^{-9}$  | $3.91 \times 10^{-9}$  | $1.16 \times 10^{-9}$  |
| BbF        | 8       | $1.21 \times 10^{-7}$  | $5.13 \times 10^{-8}$  | $1.66 \times 10^{-7}$  | $1.25 \times 10^{-7}$  | $3.93 \times 10^{-8}$  |
| BkF        | 6       | $4.71 \times 10^{-8}$  | $2.31 \times 10^{-8}$  | $6.91 \times 10^{-8}$  | $4.92 \times 10^{-8}$  | $1.89 \times 10^{-8}$  |
| BaP        | 7       | $1.06 \times 10^{-6}$  | $4.72 \times 10^{-7}$  | $1.33 \times 10^{-6}$  | $1.13 \times 10^{-6}$  | $3.05 \times 10^{-7}$  |
| IcP        | 7       | $1.98 \times 10^{-7}$  | $7.15 \times 10^{-8}$  | $2.69 \times 10^{-7}$  | $2.26 \times 10^{-7}$  | $7.49 \times 10^{-8}$  |
| BgP        | 7       | $1.53 \times 10^{-8}$  | $6.13 \times 10^{-9}$  | $1.97 \times 10^{-8}$  | $1.75 \times 10^{-8}$  | $5.61 \times 10^{-9}$  |
| Total PAHs | 12      | $9.60 \times 10^{-7}$  | $2.12 \times 10^{-9}$  | $2.11 \times 10^{-6}$  | $9.42 \times 10^{-7}$  | $8.93 \times 10^{-7}$  |

**Table S11:** Incremental Lifetime Cancer Risk (ILCR) for adult through ingestion pathway

| Compound | Valid N | Mean                   | Min                    | Max                    | Median                 | Std dev.               |
|----------|---------|------------------------|------------------------|------------------------|------------------------|------------------------|
| ACY      | 6       | $1.34 \times 10^{-10}$ | $7.13 \times 10^{-11}$ | $1.73 \times 10^{-10}$ | $1.49 \times 10^{-10}$ | $4.01 \times 10^{-11}$ |
| ACP      | 1       | $4.85 \times 10^{-11}$ | $4.85 \times 10^{-11}$ | $4.85 \times 10^{-11}$ | $4.85 \times 10^{-11}$ | -                      |
| FLR      | 5       | $8.24 \times 10^{-11}$ | $3.72 \times 10^{-11}$ | $9.51 \times 10^{-11}$ | $9.44 \times 10^{-11}$ | $2.54 \times 10^{-11}$ |
| PHE      | 2       | $1.19 \times 10^{-10}$ | $1.15 \times 10^{-10}$ | $1.24 \times 10^{-10}$ | $1.19 \times 10^{-10}$ | $6.36 \times 10^{-12}$ |
| ANT      | 10      | $5.11 \times 10^{-9}$  | $1.41 \times 10^{-9}$  | $9.29 \times 10^{-9}$  | $5.21 \times 10^{-9}$  | $3.24 \times 10^{-9}$  |
| PYR      | 11      | $6.70 \times 10^{-10}$ | $4.26 \times 10^{-11}$ | $1.43 \times 10^{-9}$  | $6.03 \times 10^{-10}$ | $5.62 \times 10^{-10}$ |



|            |    |                       |                       |                       |                       |                        |
|------------|----|-----------------------|-----------------------|-----------------------|-----------------------|------------------------|
| BaA        | 9  | $1.11 \times 10^{-7}$ | $1.63 \times 10^{-8}$ | $1.97 \times 10^{-7}$ | $1.13 \times 10^{-7}$ | $6.70 \times 10^{-8}$  |
| CHY        | 6  | $2.89 \times 10^{-9}$ | $1.15 \times 10^{-9}$ | $3.82 \times 10^{-9}$ | $3.05 \times 10^{-9}$ | $9.06 \times 10^{-10}$ |
| BbF        | 8  | $9.44 \times 10^{-8}$ | $4.00 \times 10^{-8}$ | $1.30 \times 10^{-7}$ | $9.77 \times 10^{-8}$ | $3.07 \times 10^{-8}$  |
| BkF        | 6  | $3.68 \times 10^{-8}$ | $1.80 \times 10^{-8}$ | $5.39 \times 10^{-8}$ | $3.84 \times 10^{-8}$ | $1.47 \times 10^{-8}$  |
| BaP        | 7  | $8.25 \times 10^{-7}$ | $3.69 \times 10^{-7}$ | $1.04 \times 10^{-6}$ | $8.80 \times 10^{-7}$ | $2.38 \times 10^{-7}$  |
| IcP        | 7  | $1.55 \times 10^{-7}$ | $5.58 \times 10^{-8}$ | $2.10 \times 10^{-7}$ | $1.76 \times 10^{-7}$ | $5.84 \times 10^{-8}$  |
| BgP        | 7  | $1.20 \times 10^{-8}$ | $4.78 \times 10^{-9}$ | $1.54 \times 10^{-8}$ | $1.37 \times 10^{-8}$ | $4.38 \times 10^{-9}$  |
| Total PAHs | 12 | $7.49 \times 10^{-7}$ | $1.66 \times 10^{-9}$ | $1.65 \times 10^{-6}$ | $7.35 \times 10^{-7}$ | $6.97 \times 10^{-7}$  |

**Table S12:** Incremental Lifetime Cancer Risk (ILCR) for children through the dermal pathway

| Compound   | Valid N | Mean                   | Min                    | Max                    | Median                 | Std dev.               |
|------------|---------|------------------------|------------------------|------------------------|------------------------|------------------------|
| ACY        | 6       | $2.14 \times 10^{-10}$ | $1.14 \times 10^{-10}$ | $2.77 \times 10^{-10}$ | $2.38 \times 10^{-10}$ | $6.40 \times 10^{-11}$ |
| ACP        | 1       | $7.74 \times 10^{-11}$ | $7.74 \times 10^{-11}$ | $7.74 \times 10^{-11}$ | $7.74 \times 10^{-11}$ | -                      |
| FLR        | 5       | $1.32 \times 10^{-10}$ | $5.93 \times 10^{-11}$ | $1.52 \times 10^{-10}$ | $1.51 \times 10^{-10}$ | $4.05 \times 10^{-11}$ |
| PHE        | 2       | $1.90 \times 10^{-10}$ | $1.83 \times 10^{-10}$ | $1.97 \times 10^{-10}$ | $1.90 \times 10^{-10}$ | $1.02 \times 10^{-11}$ |
| ANT        | 10      | $8.16 \times 10^{-9}$  | $2.25 \times 10^{-9}$  | $1.48 \times 10^{-8}$  | $8.33 \times 10^{-9}$  | $5.17 \times 10^{-9}$  |
| PYR        | 11      | $1.07 \times 10^{-9}$  | $6.80 \times 10^{-11}$ | $2.29 \times 10^{-9}$  | $9.62 \times 10^{-10}$ | $8.97 \times 10^{-10}$ |
| BaA        | 9       | $1.78 \times 10^{-7}$  | $2.60 \times 10^{-8}$  | $3.14 \times 10^{-7}$  | $1.81 \times 10^{-7}$  | $1.07 \times 10^{-7}$  |
| CHY        | 6       | $4.61 \times 10^{-9}$  | $1.83 \times 10^{-9}$  | $6.09 \times 10^{-9}$  | $4.88 \times 10^{-9}$  | $1.45 \times 10^{-9}$  |
| BbF        | 8       | $1.51 \times 10^{-7}$  | $6.39 \times 10^{-8}$  | $2.07 \times 10^{-7}$  | $1.56 \times 10^{-7}$  | $4.90 \times 10^{-8}$  |
| BkF        | 6       | $5.87 \times 10^{-8}$  | $2.88 \times 10^{-8}$  | $8.61 \times 10^{-8}$  | $6.13 \times 10^{-8}$  | $2.35 \times 10^{-8}$  |
| BaP        | 7       | $1.32 \times 10^{-6}$  | $5.89 \times 10^{-7}$  | $1.66 \times 10^{-6}$  | $1.41 \times 10^{-6}$  | $3.80 \times 10^{-7}$  |
| IcP        | 7       | $2.47 \times 10^{-7}$  | $8.91 \times 10^{-8}$  | $3.36 \times 10^{-7}$  | $2.82 \times 10^{-7}$  | $9.33 \times 10^{-8}$  |
| BgP        | 7       | $1.91 \times 10^{-8}$  | $7.64 \times 10^{-9}$  | $2.46 \times 10^{-8}$  | $2.18 \times 10^{-8}$  | $6.99 \times 10^{-9}$  |
| Total PAHs | 12      | $1.20 \times 10^{-6}$  | $2.65 \times 10^{-9}$  | $2.64 \times 10^{-6}$  | $1.17 \times 10^{-6}$  | $1.11 \times 10^{-6}$  |

**Table S13:** Incremental Lifetime Cancer Risk (ILCR) for adult through the dermal pathway

| Compound | Valid N | Mean                   | Min                    | Max                    | Median                 | Std dev.               |
|----------|---------|------------------------|------------------------|------------------------|------------------------|------------------------|
| ACY      | 6       | $2.38 \times 10^{-10}$ | $1.27 \times 10^{-10}$ | $3.08 \times 10^{-10}$ | $2.65 \times 10^{-10}$ | $7.12 \times 10^{-11}$ |
| ACP      | 1       | $8.61 \times 10^{-11}$ | $8.61 \times 10^{-11}$ | $8.61 \times 10^{-11}$ | $8.61 \times 10^{-11}$ | -                      |
| FLR      | 5       | $1.46 \times 10^{-10}$ | $6.60 \times 10^{-11}$ | $1.69 \times 10^{-10}$ | $1.68 \times 10^{-10}$ | $4.51 \times 10^{-11}$ |
| PHE      | 2       | $2.12 \times 10^{-10}$ | $2.04 \times 10^{-10}$ | $2.20 \times 10^{-10}$ | $2.12 \times 10^{-10}$ | $1.13 \times 10^{-11}$ |
| ANT      | 10      | $9.08 \times 10^{-9}$  | $2.51 \times 10^{-9}$  | $1.65 \times 10^{-8}$  | $9.26 \times 10^{-9}$  | $5.75 \times 10^{-9}$  |
| PYR      | 11      | $1.19 \times 10^{-9}$  | $7.56 \times 10^{-11}$ | $2.55 \times 10^{-9}$  | $1.07 \times 10^{-9}$  | $9.98 \times 10^{-10}$ |
| BaA      | 9       | $1.98 \times 10^{-7}$  | $2.89 \times 10^{-8}$  | $3.49 \times 10^{-7}$  | $2.01 \times 10^{-7}$  | $1.19 \times 10^{-7}$  |
| CHY      | 6       | $5.13 \times 10^{-9}$  | $2.04 \times 10^{-9}$  | $6.78 \times 10^{-9}$  | $5.42 \times 10^{-9}$  | $1.61 \times 10^{-9}$  |
| BbF      | 8       | $1.68 \times 10^{-7}$  | $7.11 \times 10^{-8}$  | $2.30 \times 10^{-7}$  | $1.74 \times 10^{-7}$  | $5.45 \times 10^{-8}$  |
| BkF      | 6       | $6.53 \times 10^{-8}$  | $3.20 \times 10^{-8}$  | $9.58 \times 10^{-8}$  | $6.82 \times 10^{-8}$  | $2.61 \times 10^{-8}$  |
| BaP      | 7       | $1.46 \times 10^{-6}$  | $6.55 \times 10^{-7}$  | $1.84 \times 10^{-6}$  | $1.56 \times 10^{-6}$  | $4.23 \times 10^{-7}$  |

|            |    |                       |                       |                       |                       |                       |
|------------|----|-----------------------|-----------------------|-----------------------|-----------------------|-----------------------|
| IcP        | 7  | $2.75 \times 10^{-7}$ | $9.91 \times 10^{-8}$ | $3.74 \times 10^{-7}$ | $3.13 \times 10^{-7}$ | $1.04 \times 10^{-7}$ |
| BgP        | 7  | $2.12 \times 10^{-8}$ | $8.49 \times 10^{-9}$ | $2.73 \times 10^{-8}$ | $2.43 \times 10^{-8}$ | $7.78 \times 10^{-9}$ |
| Total PAHs | 12 | $1.33 \times 10^{-6}$ | $2.95 \times 10^{-9}$ | $2.93 \times 10^{-6}$ | $1.31 \times 10^{-6}$ | $1.24 \times 10^{-6}$ |

**Table S14:** Hazard quotient (HQ) of children for street dust near bus station through inhalation

| Compound          | Valid N | Mean                   | Median                 | Minimum                | Maximum                |
|-------------------|---------|------------------------|------------------------|------------------------|------------------------|
| ACY               | 6       | $2.19 \times 10^{-9}$  | $2.43 \times 10^{-9}$  | $1.16 \times 10^{-9}$  | $2.83 \times 10^{-9}$  |
| ACP               | 1       | $7.90 \times 10^{-10}$ | $7.90 \times 10^{-10}$ | $7.90 \times 10^{-10}$ | $7.90 \times 10^{-10}$ |
| FLR               | 5       | $2.02 \times 10^{-9}$  | $2.31 \times 10^{-9}$  | $9.09 \times 10^{-10}$ | $2.33 \times 10^{-9}$  |
| PHE               | 2       | $1.64 \times 10^{-8}$  | $1.64 \times 10^{-8}$  | $1.58 \times 10^{-8}$  | $1.70 \times 10^{-8}$  |
| ANT               | 10      | $1.67 \times 10^{-9}$  | $1.70 \times 10^{-9}$  | $4.60 \times 10^{-10}$ | $3.03 \times 10^{-9}$  |
| PYR               | 11      | $2.18 \times 10^{-8}$  | $1.97 \times 10^{-8}$  | $1.39 \times 10^{-9}$  | $4.68 \times 10^{-8}$  |
| BaP               | 7       | $2.69 \times 10^{-6}$  | $2.87 \times 10^{-6}$  | $1.20 \times 10^{-6}$  | $3.38 \times 10^{-6}$  |
| BgP               | 7       | $3.90 \times 10^{-8}$  | $4.45 \times 10^{-8}$  | $1.56 \times 10^{-8}$  | $5.02 \times 10^{-8}$  |
| $\Sigma$ Total HQ | 12      | $1.62 \times 10^{-6}$  | $1.71 \times 10^{-6}$  | $1.39 \times 10^{-9}$  | $3.50 \times 10^{-6}$  |

**Table S15:** Hazard quotient (HQ) of adults for street dust near bust station through inhalation

| Compound          | Valid N | Mean                   | Median                 | Minimum                | Maximum                |
|-------------------|---------|------------------------|------------------------|------------------------|------------------------|
| ACY               | 6       | $1.88 \times 10^{-9}$  | $2.08 \times 10^{-9}$  | $9.96 \times 10^{-10}$ | $2.42 \times 10^{-9}$  |
| ACP               | 1       | $6.78 \times 10^{-10}$ | $6.78 \times 10^{-10}$ | $6.78 \times 10^{-10}$ | $6.78 \times 10^{-10}$ |
| FLR               | 5       | $1.73 \times 10^{-9}$  | $1.98 \times 10^{-9}$  | $7.79 \times 10^{-10}$ | $1.99 \times 10^{-9}$  |
| PHE               | 2       | $1.41 \times 10^{-8}$  | $1.41 \times 10^{-8}$  | $1.35 \times 10^{-8}$  | $1.46 \times 10^{-8}$  |
| ANT               | 11      | $1.30 \times 10^{-9}$  | $1.06 \times 10^{-9}$  | $3.94 \times 10^{-10}$ | $2.60 \times 10^{-9}$  |
| PYR               | 11      | $1.87 \times 10^{-8}$  | $1.69 \times 10^{-8}$  | $1.19 \times 10^{-9}$  | $4.01 \times 10^{-8}$  |
| BaP               | 7       | $2.30 \times 10^{-6}$  | $2.46 \times 10^{-6}$  | $1.03 \times 10^{-6}$  | $2.90 \times 10^{-6}$  |
| BgP               | 7       | $3.34 \times 10^{-8}$  | $3.82 \times 10^{-8}$  | $1.34 \times 10^{-8}$  | $4.30 \times 10^{-8}$  |
| $\Sigma$ Total HQ | 12      | $1.39 \times 10^{-6}$  | $1.46 \times 10^{-6}$  | $1.19 \times 10^{-9}$  | $3.00 \times 10^{-6}$  |

**Table S16:** Hazard quotient (HQ) of children for street dust near bus station through ingestion

| Compound          | Valid N | Mean                  | Median                | Minimum               | Maximum               |
|-------------------|---------|-----------------------|-----------------------|-----------------------|-----------------------|
| ACY               | 6       | $1.49 \times 10^{-5}$ | $1.65 \times 10^{-5}$ | $7.90 \times 10^{-6}$ | $1.92 \times 10^{-5}$ |
| ACP               | 1       | $5.38 \times 10^{-6}$ | $5.38 \times 10^{-6}$ | $5.38 \times 10^{-6}$ | $5.38 \times 10^{-6}$ |
| FLR               | 5       | $1.37 \times 10^{-5}$ | $1.57 \times 10^{-5}$ | $6.18 \times 10^{-6}$ | $1.58 \times 10^{-5}$ |
| PHE               | 2       | $1.12 \times 10^{-4}$ | $1.12 \times 10^{-4}$ | $1.07 \times 10^{-4}$ | $1.16 \times 10^{-4}$ |
| ANT               | 10      | $1.13 \times 10^{-5}$ | $1.16 \times 10^{-5}$ | $3.13 \times 10^{-6}$ | $2.06 \times 10^{-5}$ |
| PYR               | 11      | $1.49 \times 10^{-4}$ | $1.34 \times 10^{-4}$ | $9.44 \times 10^{-6}$ | $3.18 \times 10^{-4}$ |
| BaP               | 7       | $1.83 \times 10^{-2}$ | $1.95 \times 10^{-2}$ | $8.17 \times 10^{-3}$ | $2.30 \times 10^{-2}$ |
| BgP               | 7       | $2.65 \times 10^{-4}$ | $3.03 \times 10^{-4}$ | $1.06 \times 10^{-4}$ | $3.41 \times 10^{-4}$ |
| $\Sigma$ Total HQ | 12      | $1.10 \times 10^{-2}$ | $1.16 \times 10^{-2}$ | $9.44 \times 10^{-6}$ | $2.38 \times 10^{-2}$ |

**Table S17:** Hazard quotient (HQ) of adult for street dust near bus station through ingestion

| Compound          | Valid N | Mean                  | Median                | Minimum               | Maximum               |
|-------------------|---------|-----------------------|-----------------------|-----------------------|-----------------------|
| ACY               | 6       | $1.59 \times 10^{-6}$ | $1.77 \times 10^{-6}$ | $8.46 \times 10^{-7}$ | $2.06 \times 10^{-6}$ |
| ACP               | 1       | $5.76 \times 10^{-7}$ | $5.76 \times 10^{-7}$ | $5.76 \times 10^{-7}$ | $5.76 \times 10^{-7}$ |
| FLR               | 5       | $1.47 \times 10^{-6}$ | $1.68 \times 10^{-6}$ | $6.62 \times 10^{-7}$ | $1.70 \times 10^{-6}$ |
| PHE               | 2       | $1.20 \times 10^{-5}$ | $1.20 \times 10^{-5}$ | $1.15 \times 10^{-5}$ | $1.24 \times 10^{-5}$ |
| ANT               | 10      | $1.21 \times 10^{-6}$ | $1.24 \times 10^{-6}$ | $3.35 \times 10^{-7}$ | $2.21 \times 10^{-6}$ |
| PYR               | 11      | $1.59 \times 10^{-5}$ | $1.43 \times 10^{-5}$ | $1.01 \times 10^{-6}$ | $3.41 \times 10^{-5}$ |
| BaP               | 7       | $1.96 \times 10^{-3}$ | $2.09 \times 10^{-3}$ | $8.76 \times 10^{-4}$ | $2.46 \times 10^{-3}$ |
| BgP               | 7       | $2.84 \times 10^{-5}$ | $3.25 \times 10^{-5}$ | $1.14 \times 10^{-5}$ | $3.65 \times 10^{-5}$ |
| $\Sigma$ Total HQ | 12      | $1.18 \times 10^{-3}$ | $1.24 \times 10^{-3}$ | $1.01 \times 10^{-6}$ | $2.55 \times 10^{-3}$ |

**Table S18:** Hazard quotient (HQ) of children for street dust near bus station through dermal

| Compound          | Valid N | Mean                  | Median                | Minimum               | Maximum               |
|-------------------|---------|-----------------------|-----------------------|-----------------------|-----------------------|
| ACY               | 6       | $5.41 \times 10^{-6}$ | $6.02 \times 10^{-6}$ | $2.88 \times 10^{-6}$ | $6.99 \times 10^{-6}$ |
| ACP               | 1       | $1.96 \times 10^{-6}$ | $1.96 \times 10^{-6}$ | $1.96 \times 10^{-6}$ | $1.96 \times 10^{-6}$ |
| FLR               | 5       | $4.99 \times 10^{-6}$ | $5.72 \times 10^{-6}$ | $2.25 \times 10^{-6}$ | $5.76 \times 10^{-6}$ |
| PHE               | 2       | $4.06 \times 10^{-5}$ | $4.06 \times 10^{-5}$ | $3.91 \times 10^{-5}$ | $4.22 \times 10^{-5}$ |
| ANT               | 10      | $4.13 \times 10^{-6}$ | $4.21 \times 10^{-6}$ | $1.14 \times 10^{-6}$ | $7.50 \times 10^{-6}$ |
| PYR               | 11      | $5.41 \times 10^{-5}$ | $4.87 \times 10^{-5}$ | $3.44 \times 10^{-6}$ | $1.16 \times 10^{-4}$ |
| BaP               | 7       | $6.66 \times 10^{-3}$ | $7.11 \times 10^{-3}$ | $2.98 \times 10^{-3}$ | $8.37 \times 10^{-3}$ |
| BgP               | 7       | $9.65 \times 10^{-5}$ | $1.10 \times 10^{-4}$ | $3.86 \times 10^{-5}$ | $1.24 \times 10^{-4}$ |
| $\Sigma$ Total HQ | 12      | $4.00 \times 10^{-3}$ | $4.22 \times 10^{-3}$ | $3.44 \times 10^{-6}$ | $8.67 \times 10^{-3}$ |

**Table S19:** Hazard quotient (HQ) of adults for street dust near bus station through dermal

| Compound          | Valid N | Mean                  | Median                | Minimum               | Maximum               |
|-------------------|---------|-----------------------|-----------------------|-----------------------|-----------------------|
| ACY               | 6       | $8.27 \times 10^{-7}$ | $9.19 \times 10^{-7}$ | $4.39 \times 10^{-7}$ | $1.07 \times 10^{-6}$ |
| ACP               | 1       | $2.99 \times 10^{-7}$ | $2.99 \times 10^{-7}$ | $2.99 \times 10^{-7}$ | $2.99 \times 10^{-7}$ |
| FLR               | 5       | $7.62 \times 10^{-7}$ | $8.73 \times 10^{-7}$ | $3.43 \times 10^{-7}$ | $8.79 \times 10^{-7}$ |
| PHE               | 2       | $6.21 \times 10^{-6}$ | $6.21 \times 10^{-6}$ | $5.97 \times 10^{-6}$ | $6.44 \times 10^{-6}$ |
| ANT               | 11      | $5.73 \times 10^{-7}$ | $4.69 \times 10^{-7}$ | $1.74 \times 10^{-7}$ | $1.14 \times 10^{-6}$ |
| PYR               | 11      | $8.25 \times 10^{-6}$ | $7.43 \times 10^{-6}$ | $5.25 \times 10^{-7}$ | $1.77 \times 10^{-5}$ |
| BaP               | 7       | $1.02 \times 10^{-3}$ | $1.09 \times 10^{-3}$ | $4.54 \times 10^{-4}$ | $1.28 \times 10^{-3}$ |
| BgP               | 7       | $1.47 \times 10^{-5}$ | $1.68 \times 10^{-5}$ | $5.89 \times 10^{-6}$ | $1.90 \times 10^{-5}$ |
| $\Sigma$ Total HQ | 12      | $6.11 \times 10^{-4}$ | $6.44 \times 10^{-4}$ | $5.25 \times 10^{-7}$ | $1.32 \times 10^{-3}$ |

## References

1. Ali, N.; Ismail, I.M.I.; Khoder, M.; Shamy, M.; Alghamdi, M.; Al Khalaf, A.; Costa, M. Polycyclic aromatic hydrocarbons (PAHs) in the settled dust of automobile workshops, health and carcinogenic risk evaluation. *Science of the Total Environment* **2017**, *601*, 478-484.
2. Anh, H.Q.; Minh, T.B.; Tran, T.M.; Takahashi, S. Road dust contamination by polycyclic aromatic hydrocarbons and their methylated derivatives in northern Vietnam: Concentrations, profiles, emission sources, and risk assessment. *Environmental Pollution* **2019**, *254*, 113073.
3. Bandowe, B.A.M.; Nkansah, M.A. Occurrence, distribution and health risk from polycyclic aromatic compounds (PAHs, oxygenated-PAHs and azaarenes) in street dust from a major West African Metropolis. *Science of the total environment* **2016**, *553*, 439-449.
4. Wei, C.; Bandowe, B.A.M.; Han, Y.; Cao, J.; Zhan, C.; Wilcke, W. Polycyclic aromatic hydrocarbons (PAHs) and their derivatives (alkyl-PAHs, oxygenated-PAHs, nitrated-PAHs and azaarenes) in urban road dusts from Xi'an, Central China. *Chemosphere* **2015**, *134*, 512-520.
5. Omar, N.Y.M.; Abas, M.R.B.; Ketuly, K.A.; Tahir, N.M. Concentrations of PAHs in atmospheric particles (PM-10) and roadside soil particles collected in Kuala Lumpur, Malaysia. *Atmospheric Environment* **2002**, *36*, 247-254.
6. Pies, C.; Hoffmann, B.; Petrowsky, J.; Yang, Y.; Ternes, T.A.; Hofmann, T. Characterization and source identification of polycyclic aromatic hydrocarbons (PAHs) in river bank soils. *Chemosphere* **2008**, *72*, 1594-1601.
7. Yunker, M.B.; Macdonald, R.W.; Vingarzan, R.; Mitchell, R.H.; Goyette, D.; Sylvestre, S. PAHs in the Fraser River basin: a critical appraisal of PAH ratios as indicators of PAH source and composition. *Organic geochemistry* **2002**, *33*, 489-515.
8. Brändli, R.C.; Bucheli, T.D.; Ammann, S.; Desaulles, A.; Keller, A.; Blum, F.; Stahel, W.A. Critical evaluation of PAH source apportionment tools using data from the Swiss soil monitoring network. *Journal of Environmental Monitoring* **2008**, *10*, 1278-1286.
9. Roberto, J.; Lee, W.-Y.; Campos-Díaz, S.I. Soil-borne polycyclic aromatic hydrocarbons in El Paso, Texas: analysis of a potential problem in the United States/Mexico border region. *Journal of Hazardous Materials* **2009**, *163*, 946-958.
10. Sicre, M.; Marty, J.; Saliot, A.; Aparicio, X.; Grimalt, J.; Albaiges, J. Aliphatic and aromatic hydrocarbons in different sized aerosols over the Mediterranean Sea: occurrence and origin. *Atmospheric Environment (1967)* **1987**, *21*, 2247-2259.
11. Rogge, W.F.; Hildemann, L.M.; Mazurek, M.A.; Cass, G.R.; Simoneit, B.R. Sources of fine organic aerosol. 3. Road dust, tire debris, and organometallic brake lining dust: roads as sources and sinks. *Environmental Science & Technology* **1993**, *27*, 1892-1904.
12. Manoli, E.; Kouras, A.; Samara, C. Profile analysis of ambient and source emitted particle-bound polycyclic aromatic hydrocarbons from three sites in northern Greece. *Chemosphere* **2004**, *56*, 867-878.
13. Akyüz, M.; Çabuk, H. Gas-particle partitioning and seasonal variation of polycyclic aromatic hydrocarbons in the atmosphere of Zonguldak, Turkey. *Sci. Total Environ.* **2010**, *408*, 5550-5558, doi:<https://doi.org/10.1016/j.scitotenv.2010.07.063>.
14. Khalili, N.R.; Scheff, P.A.; Holsen, T.M. PAH source fingerprints for coke ovens, diesel and, gasoline engines, highway tunnels, and wood combustion emissions. *Atmospheric environment* **1995**, *29*, 533-542.
15. Rogge, W.F.; Hildemann, L.M.; Mazurek, M.A.; Cass, G.R.; Simoneit, B.R. Sources of fine organic aerosol. 2. Noncatalyst and catalyst-equipped automobiles and heavy-duty diesel trucks. *Environmental science & technology* **1993**, *27*, 636-651.
16. Soltani, N.; Keshavarzi, B.; Moore, F.; Tavakol, T.; Lahijanzadeh, A.R.; Jaafarzadeh, N.; Kermani, M. Ecological and human health hazards of heavy metals and polycyclic aromatic hydrocarbons (PAHs) in road dust of Isfahan metropolis, Iran. *Science of The Total Environment* **2015**, *505*, 712-723, doi:<https://doi.org/10.1016/j.scitotenv.2014.09.097>.

17. EPA, U. Supplemental guidance for developing soil screening levels for superfund sites. *Peer Review Draft, OSWER* **2001**, 9355, 4-24.
18. EPA, U. Risk Assessment Guidance for Superfund: Volume I, Human Health Evaluation Manual (Part D, Standardized Planning, Reporting, and Review of Superfund Risk Assessments). *Office of Emergency and Remedial Response. US Environmental Protection Agency., Washington DC* **2001**, 20460.
19. Mihankhah, T.; Saeedi, M.; Karbassi, A. Contamination and cancer risk assessment of polycyclic aromatic hydrocarbons (PAHs) in urban dust from different land-uses in the most populated city of Iran. *Ecotoxicology and Environmental Safety* **2020**, 187, 109838, doi:<https://doi.org/10.1016/j.ecoenv.2019.109838>.
20. Škrbić, B.; Đurišić-Mladenović, N.; Živančev, J.; Tadić, Đ. Seasonal occurrence and cancer risk assessment of polycyclic aromatic hydrocarbons in street dust from the Novi Sad city, Serbia. *Science of The Total Environment* **2019**, 647, 191-203, doi:<https://doi.org/10.1016/j.scitotenv.2018.07.442>.
21. Gope, M.; Masto, R.E.; George, J.; Balachandran, S. Exposure and cancer risk assessment of polycyclic aromatic hydrocarbons (PAHs) in the street dust of Asansol city, India. *Sustainable Cities and Society* **2018**, 38, 616-626, doi:<https://doi.org/10.1016/j.scs.2018.01.006>.
